# Supplementary material for: Design, synthesis and extraction studies of a new class of conformationally constrained (N,N,N′,N′-tetraalkyl)7-oxabicyclo[2.2.1]heptane-2,3-dicarboxamides
Source: Royal Society of Chemistry journal article supplement (doi:10.1039/c5dt01691f), 2015-01-01
Supplement: c5dt01691f1.pdf [file c5dt01691f1.pdf]

## Supporting Information

### **Design, synthesis and extraction studies of a new class of conformationally constrained (N,N,N',N'-tetraalkyl) 7-oxabicyclo[2.2.1]heptane-2,3-dicarboxamides**

Shikha Sharma <sup>a</sup>, Surajit Panja<sup>b</sup>, Arunasis Bhattachariya<sup>c</sup>, Prem S. Dhami<sup>b</sup>, Preetam M. Gandhi<sup>b</sup> and Sunil K. Ghosh<sup>\*a</sup>

<sup>a</sup>Bio-Organic Division, Bhabha Atomic Research Centre, Trombay, Mumbai 400085, India

<sup>b</sup>Fuel Reprocessing Division, Bhabha Atomic Research Centre, Trombay, Mumbai 400085, India

<sup>c</sup>Radiochemistry Division, Bhabha Atomic Research Centre, Trombay, Mumbai 400085, India

E-mail: ghsunil@barc.gov.in; Tel: +91-22-25595012; Fax: +91-22-25505151

---

**Table 1** Degradation study of OBDA **1a** in HNO<sub>3</sub>

| Time (min) | % of OBDA <b>1a</b> remaining after degradation |                          |                          |
|------------|-------------------------------------------------|--------------------------|--------------------------|
|            | 0.5 M aq. HNO <sub>3</sub>                      | 1 M aq. HNO <sub>3</sub> | 3 M aq. HNO <sub>3</sub> |
| 0          | 100                                             | 100                      | 100                      |
| 5          | 99                                              | 99                       | 98                       |
| 15         | 99                                              | 98                       | 10                       |
| 30         | 98                                              | 94                       | 0                        |
| 90         | 91                                              | 46                       | -                        |
| 150        | 88                                              | 0                        | -                        |
| 330        | 61                                              | -                        | -                        |

**Table 2** Distribution ratio of Eu(III) in presence of different concentrations of Eu(III) in 3 M HNO<sub>3</sub> for 0.1 M OBDA **1a** in 15% IDA /n-dodecane.

| [Eu] (ppm) | D <sub>Eu(III)</sub> |
|------------|----------------------|
| 100        | 34.21                |
| 200        | 31.91                |
| 500        | 27.85                |
| 1000       | 21.01                |
| 2000       | 18.07                |
| 5000       | 4.97                 |

# Spectrum Plot - 11/19/2014 3:28 PM

1 A. Scan 16 from ...temal 2014-2015\cms-69\complex-2-841,1096.xms

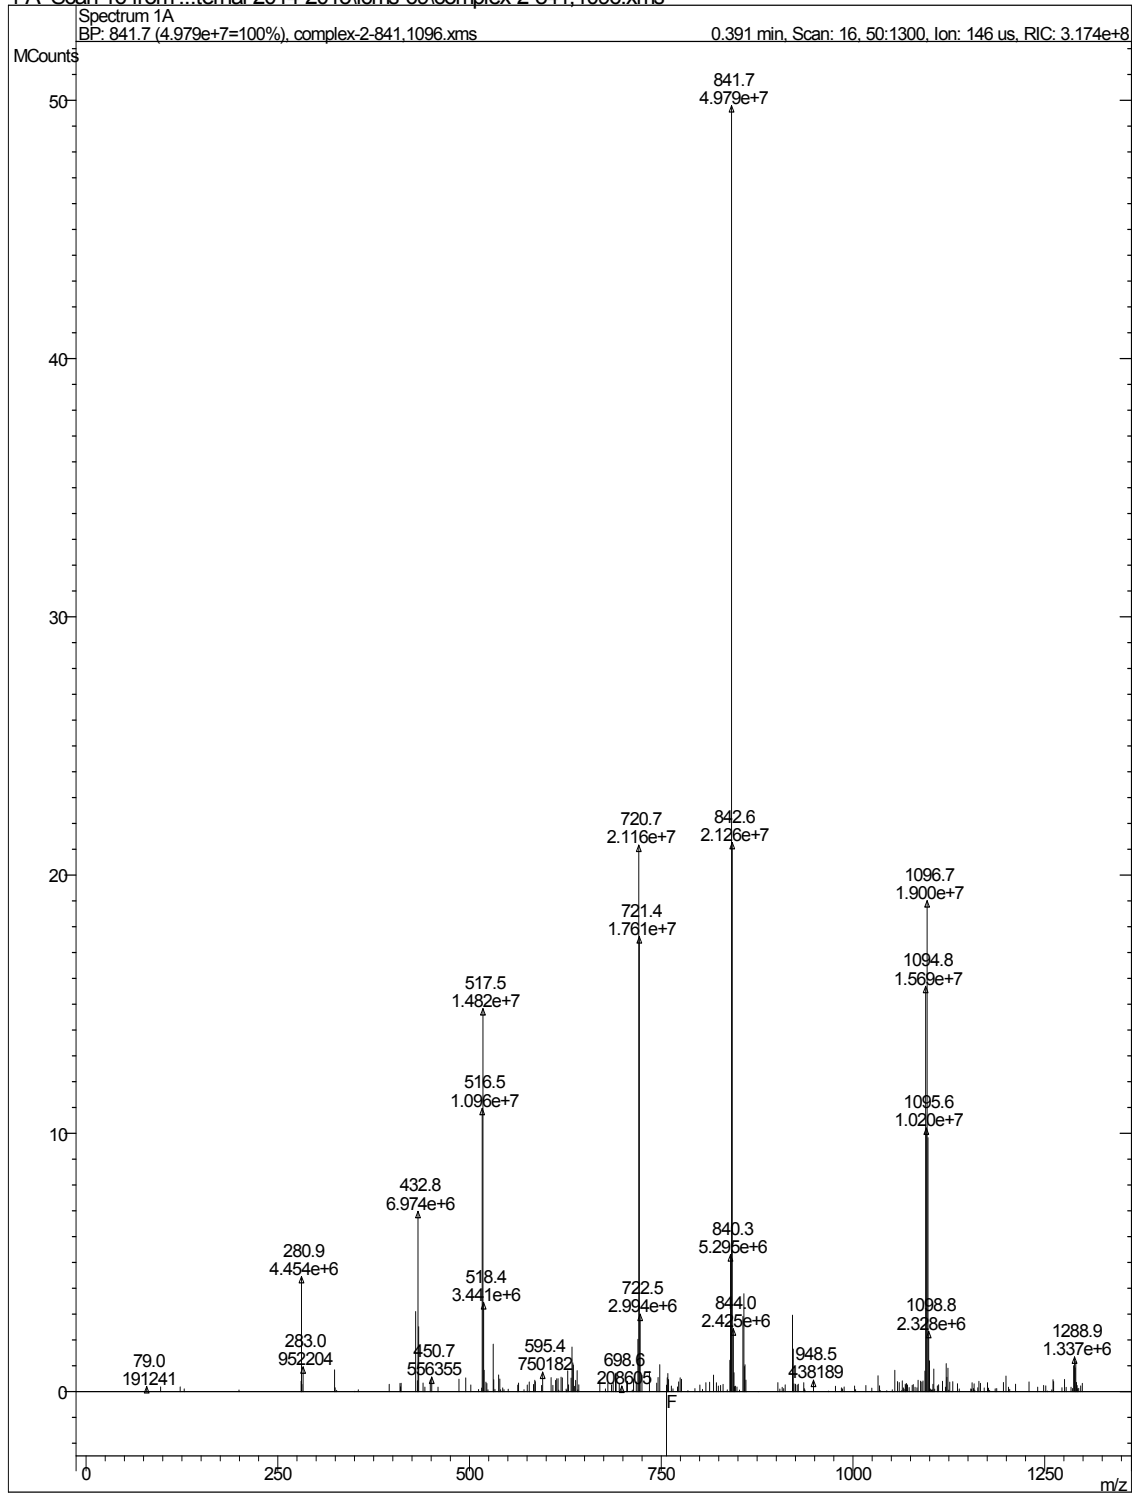

**Fig. 1** ESI-MS spectra of complex of  $\text{Eu}(\text{NO}_3)_3 \cdot 5\text{H}_2\text{O}$  with OBDA **1c**.

# <sup>1</sup>H and <sup>13</sup>C Spectra of OBDA 1a-c

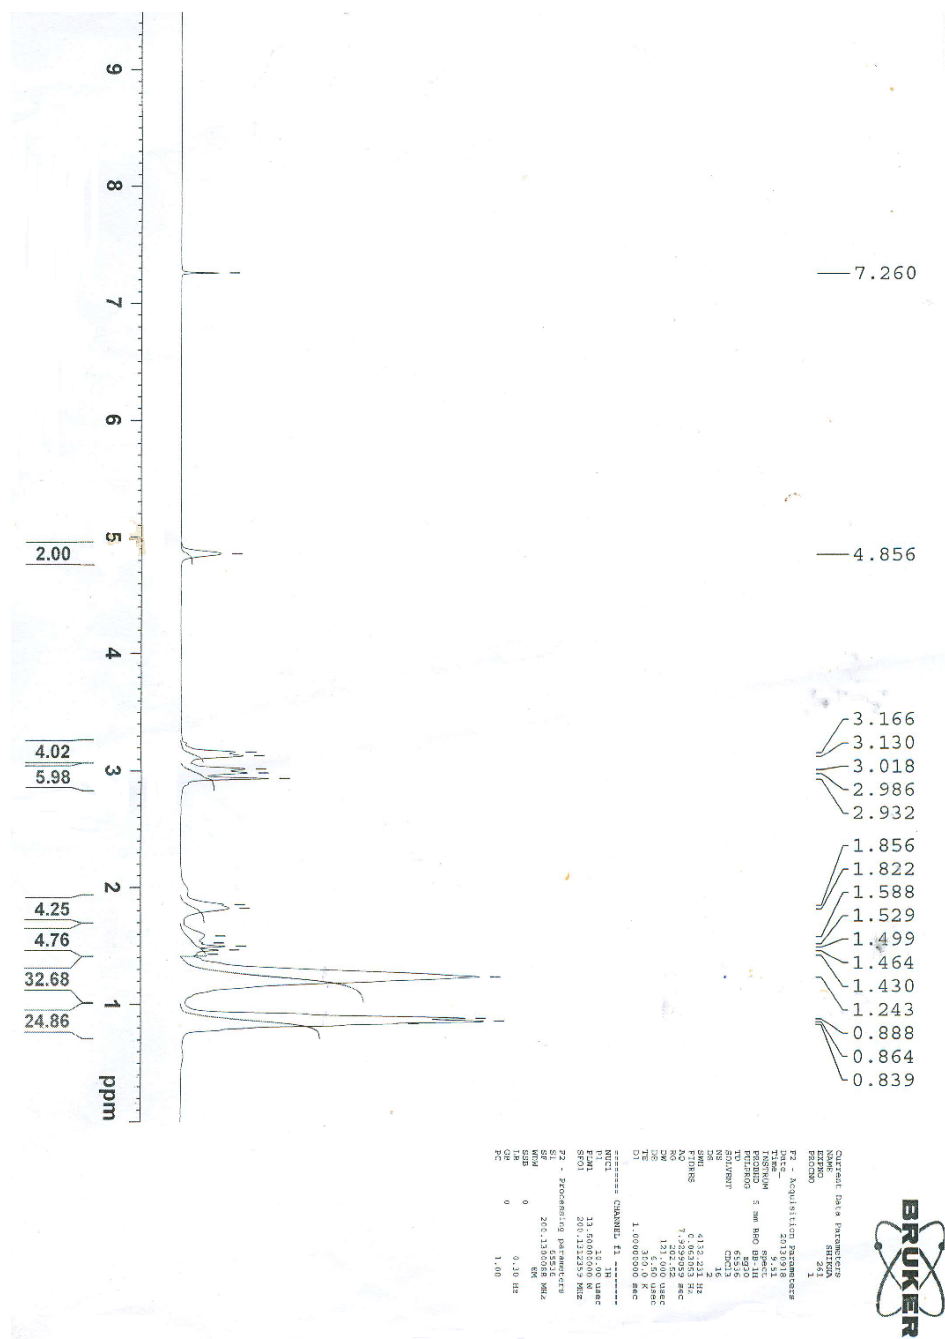

Spectrum 1. <sup>1</sup>H NMR spectra of OBDA 1a.

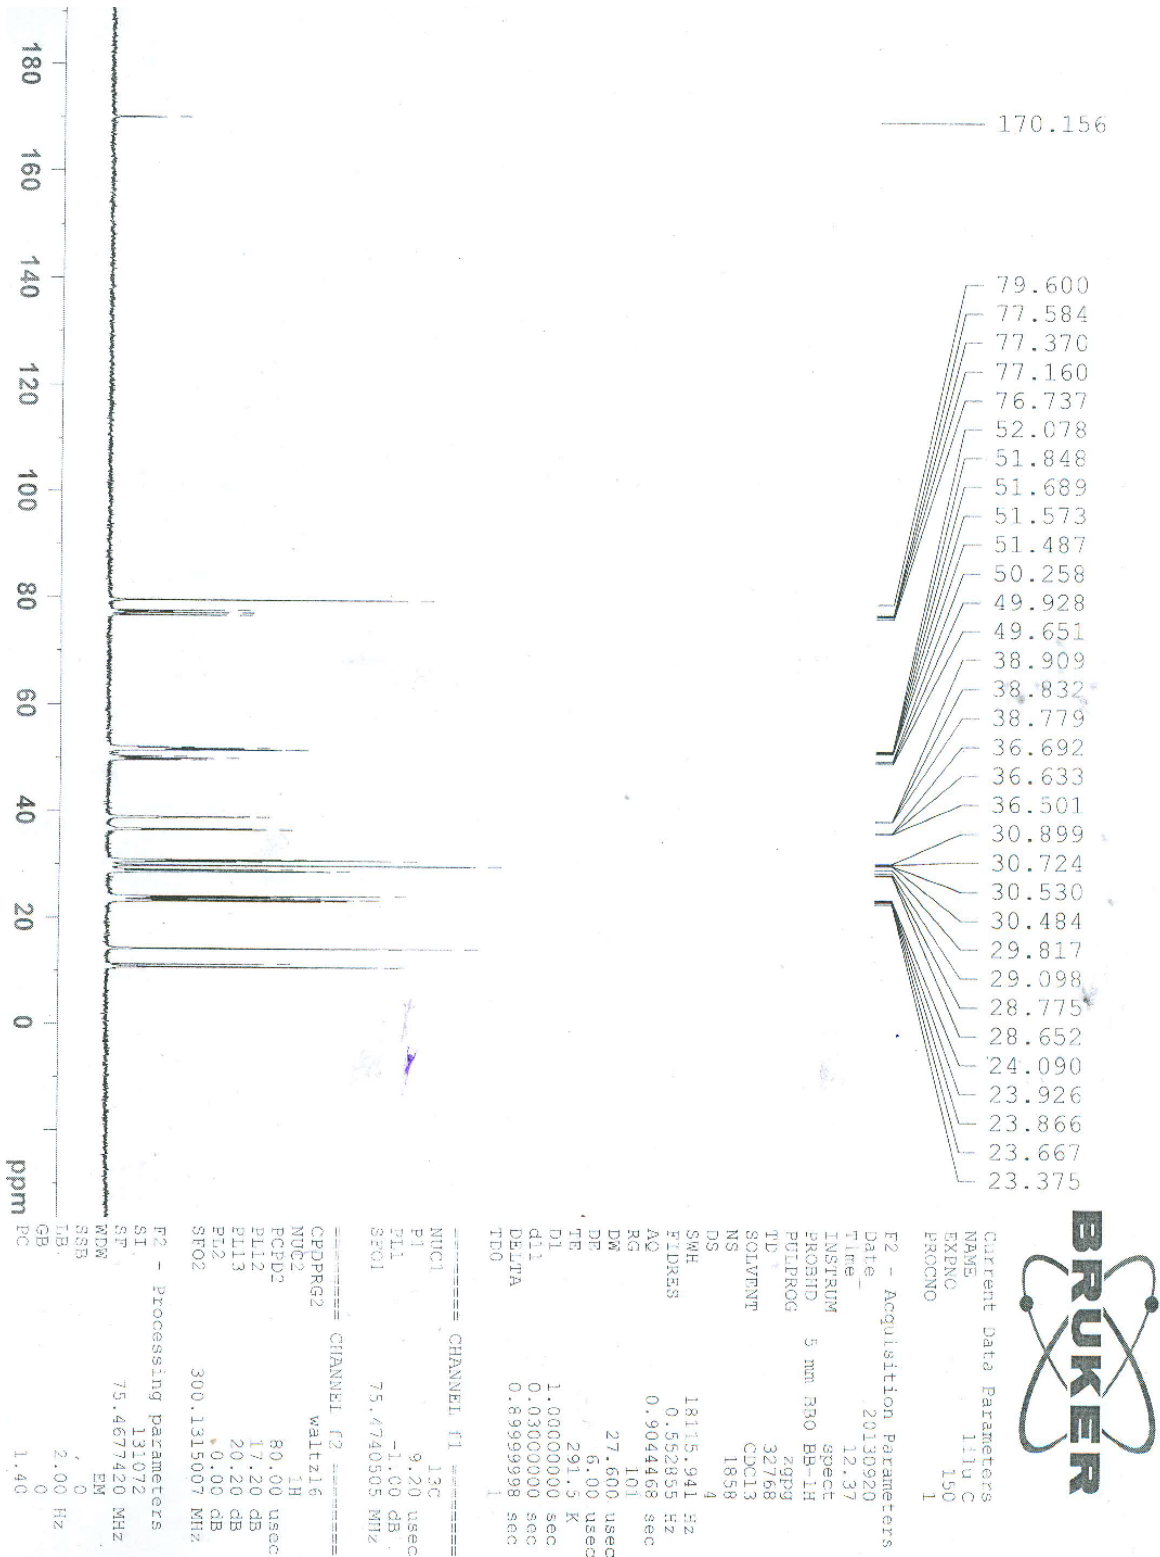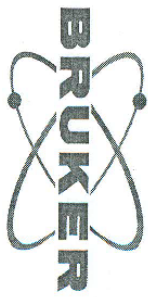

Spectrum 2. <sup>13</sup>C NMR spectra of OBDA 1a.

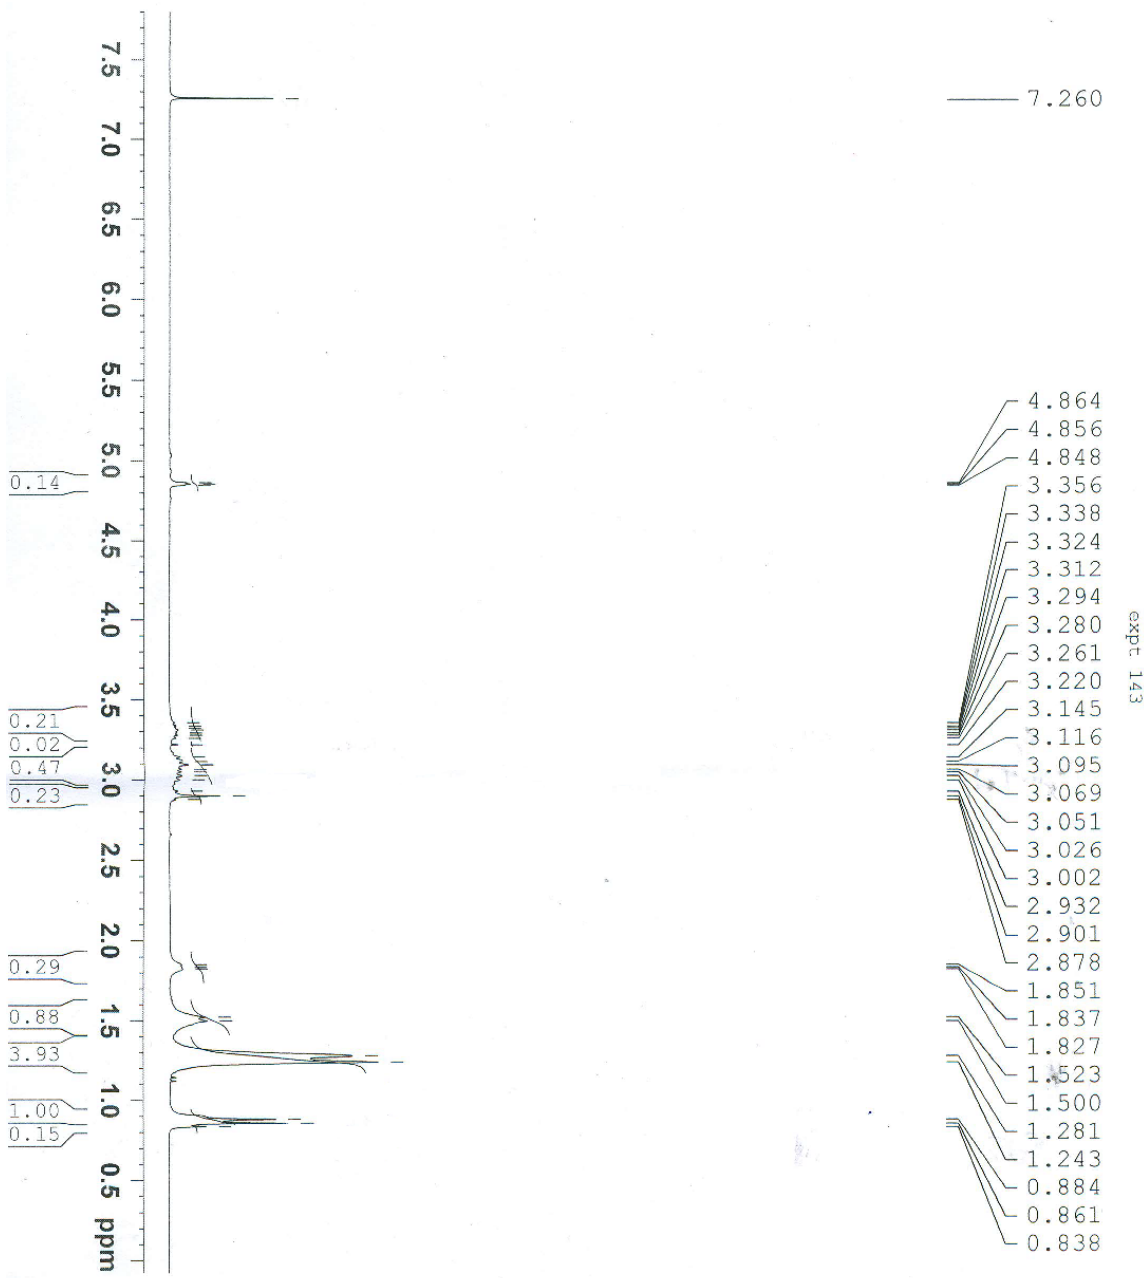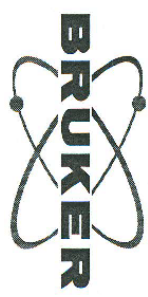

Current Data Parameters  
 NAME 1H  
 EXPNO 98  
 PROCNO 1

F2 - Acquisition Parameters  
 Date\_ 20140214  
 Time\_ 15.51  
 INSTRUM spect  
 PROBHD 5 mm BBO BB-1H  
 PULPROG zg30  
 TD 32768  
 SOLVENT CDCl3  
 NS 31  
 DS 0  
 SWH 4807.692 Hz  
 FIDRES 0.146719 Hz  
 AQ 3.4079220 sec  
 RG 101  
 DW 104.000 usec  
 DE 6.00 usec  
 TE 290.6 K  
 D1 1.00000000 sec  
 TDO 1

CHANNEL f1  
 NUC1 1H  
 P1 11.00 usec  
 PL1 0.00 dB  
 SFO1 300.1320008 MHz

F2 - Processing parameters  
 SI 16384  
 SF 300.1300032 MHz  
 WDW EM  
 SSB 0  
 LB 0.00 Hz  
 GB 0  
 PC 1.00

Spectrum 3. <sup>1</sup>H NMR spectra of OBDA 1b.

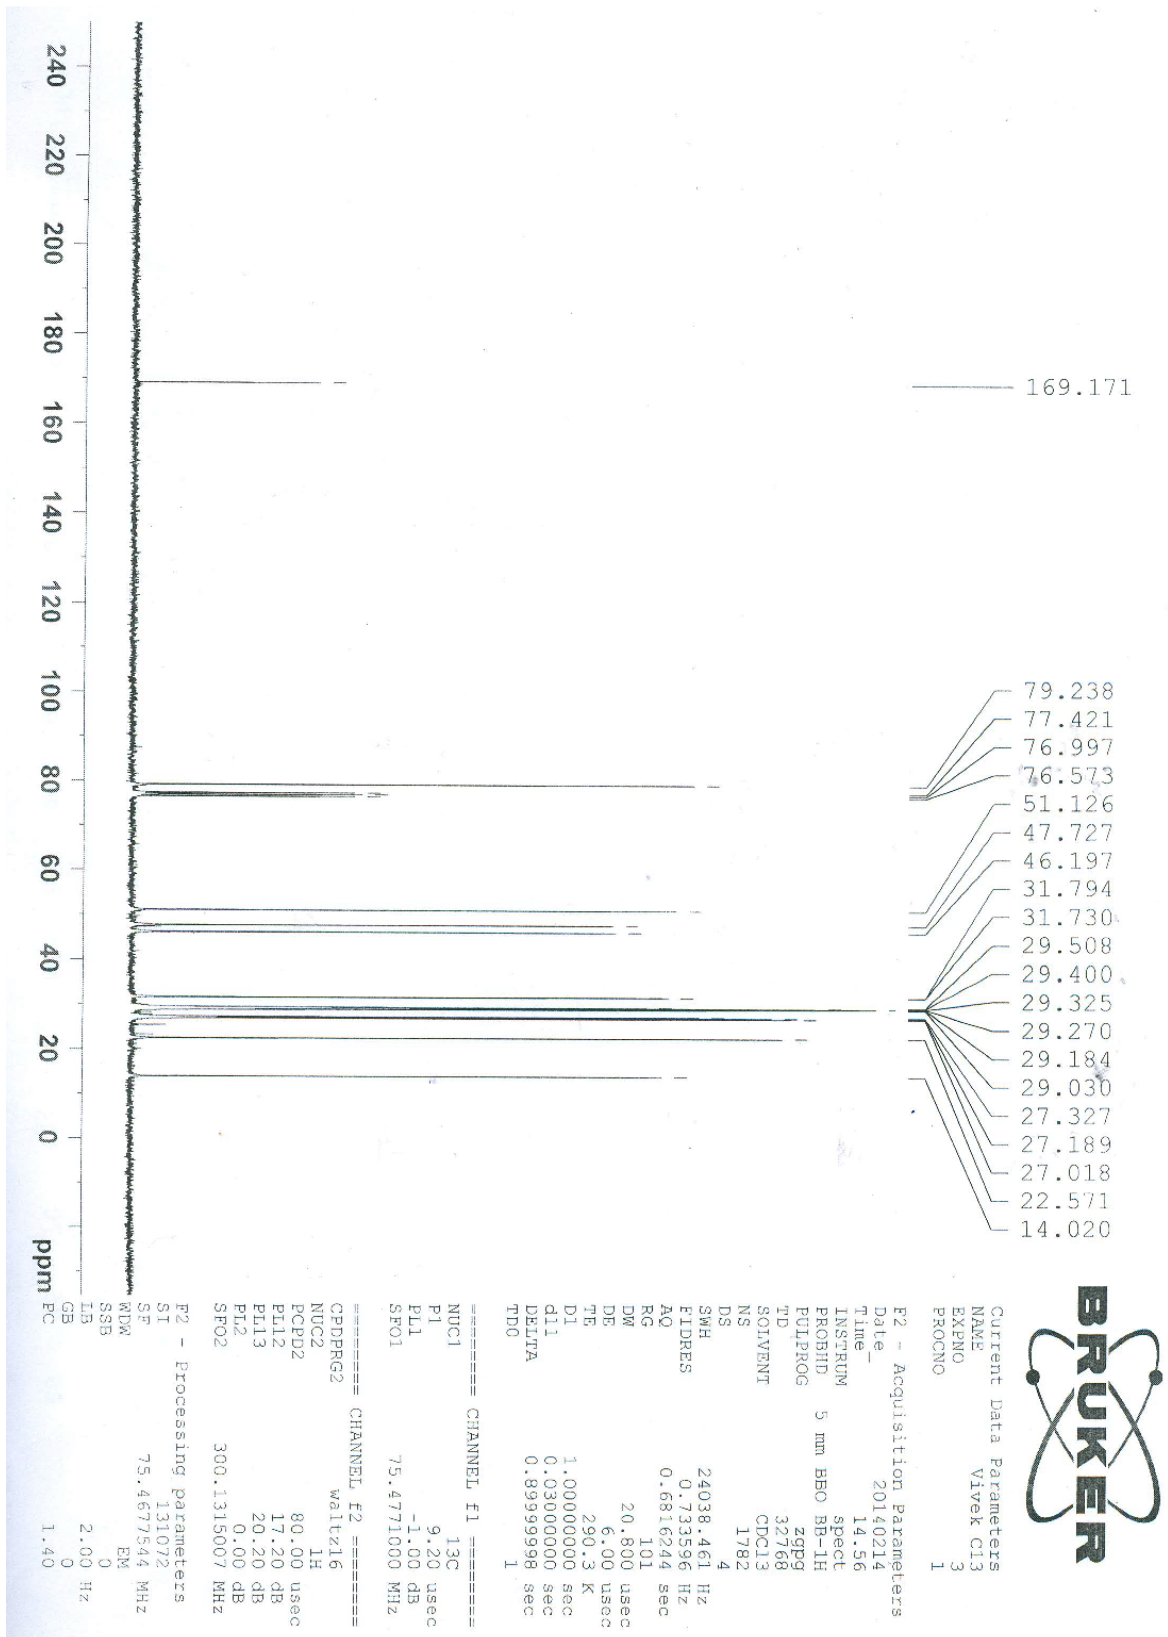

Spectrum 4. <sup>13</sup>C NMR spectra of OBDA 1b.

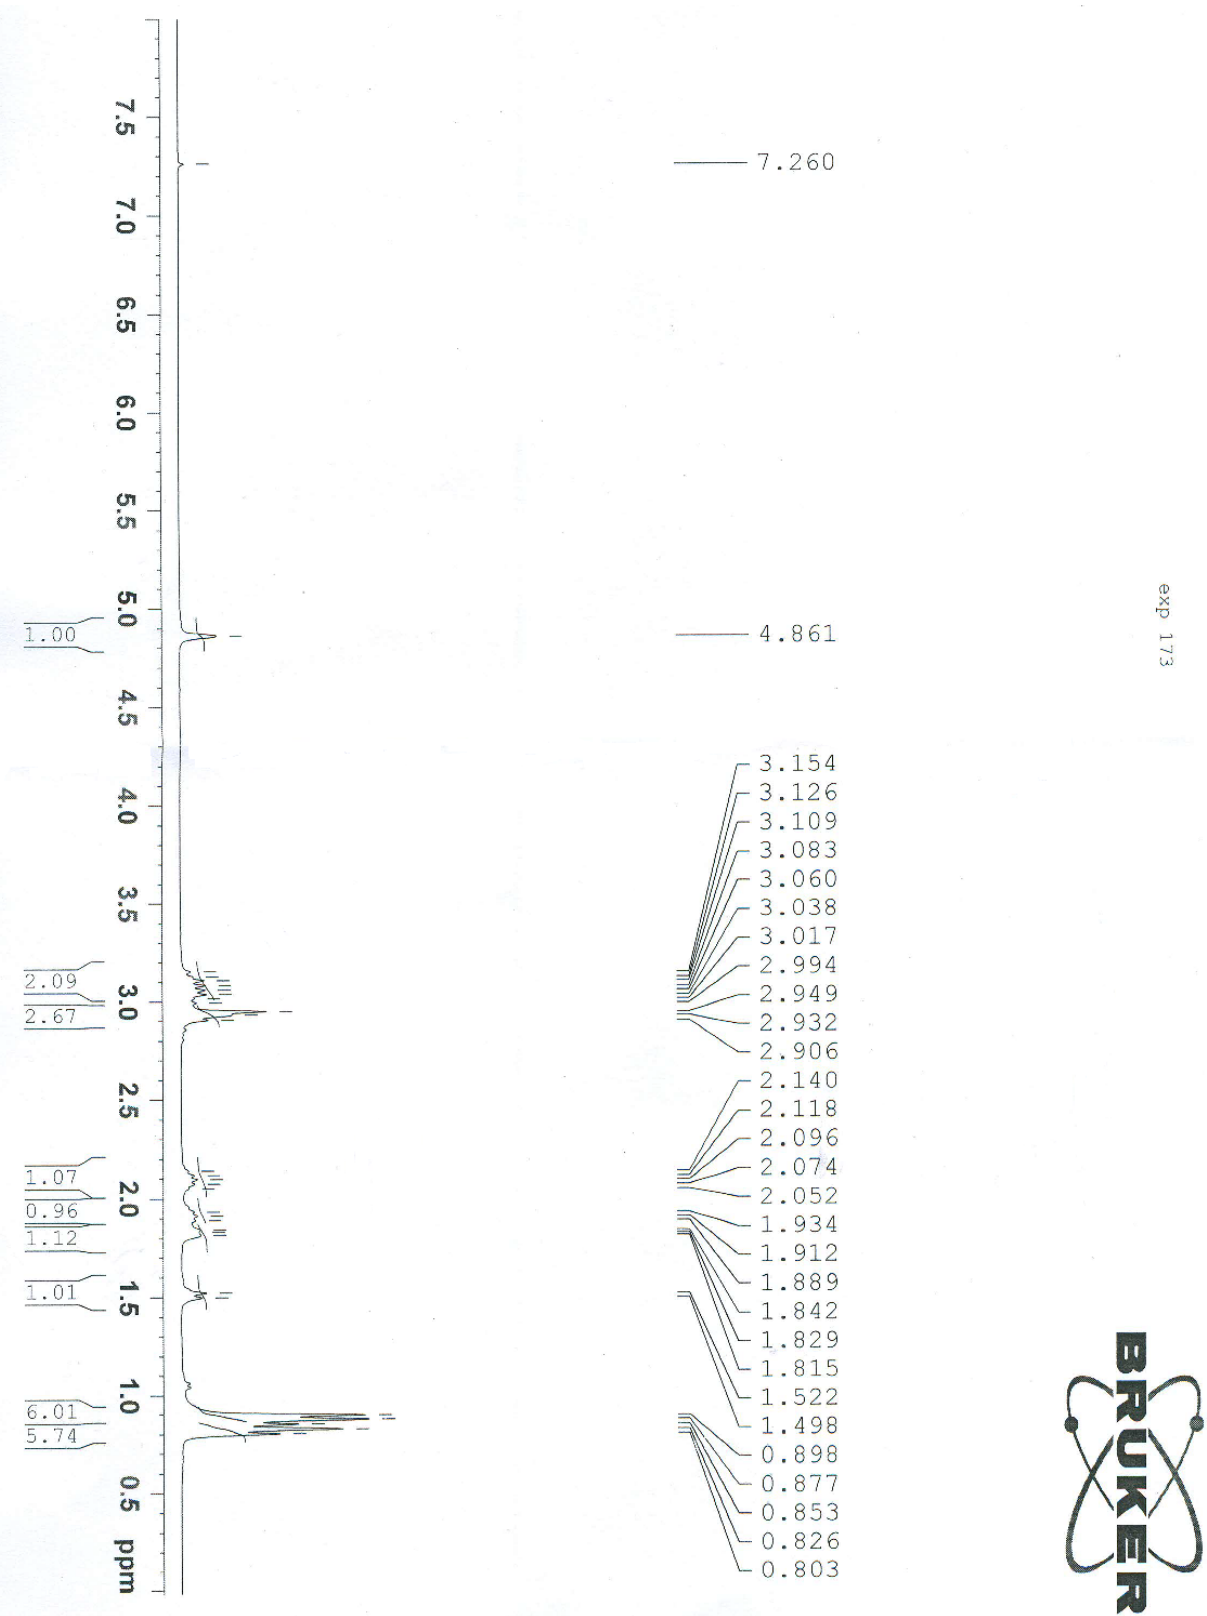

Spectrum 5. <sup>1</sup>H NMR spectra of OBDA 1c.



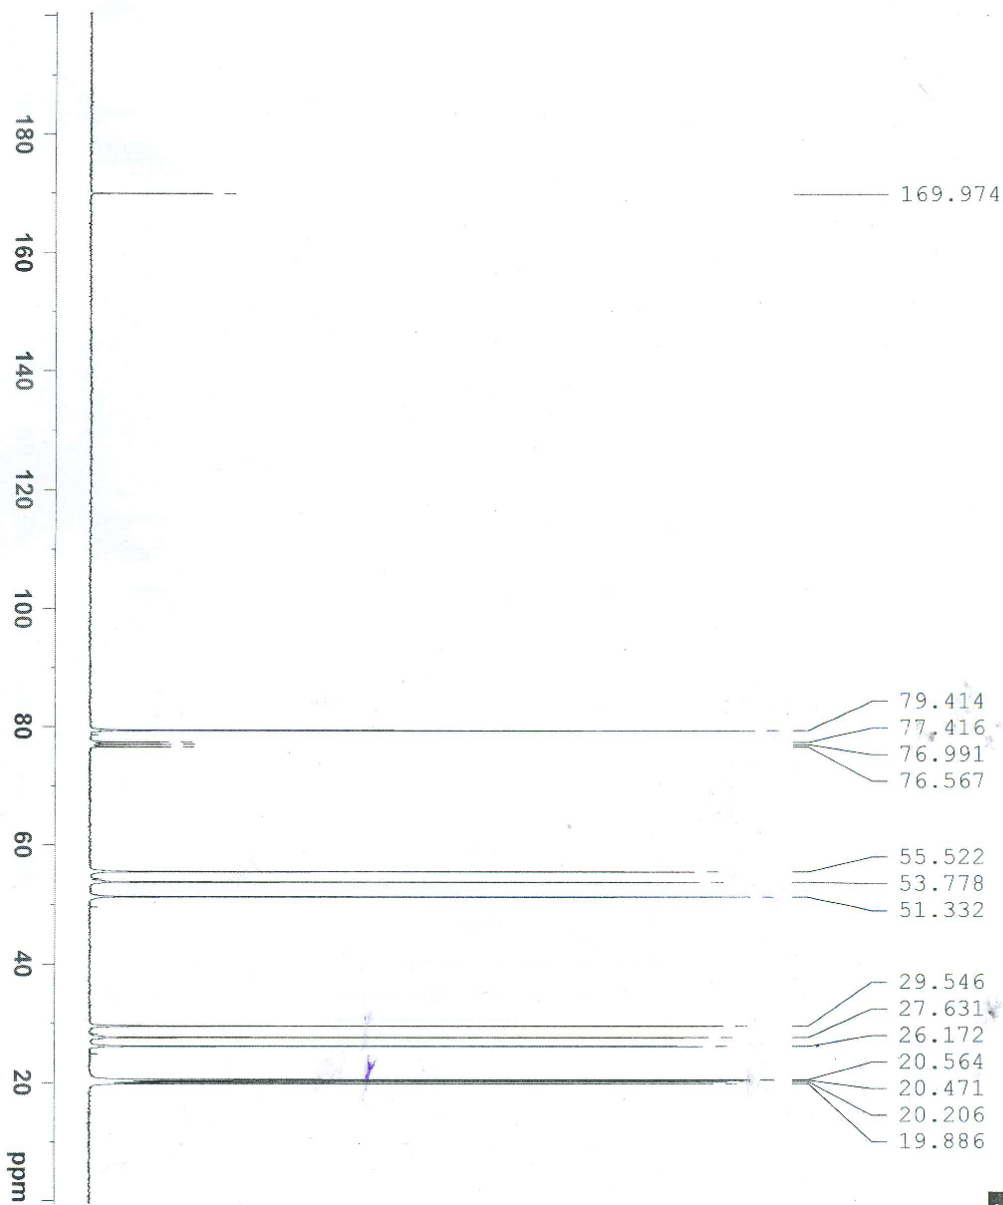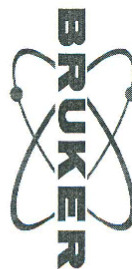

Current Data Parameters  
 NAME Vlyek C13  
 EXPNO 2  
 PROCNO 1

F2 - Acquisition Parameters  
 Date\_ 20140212  
 Time 15.08

INSTRUM spect  
 PROBHD 5 mm BBO BB-1H  
 PULPROG zgpg  
 TD 32768  
 SOLVENT CDCl<sub>3</sub>  
 NS 3455

DS 4  
 SWH 24038.461 Hz  
 FIDRES 0.733596 Hz  
 AQ 0.6816244 sec  
 RG 101  
 DM 20.800 usec  
 DE 6.00 usec  
 TE 290.3 K  
 D1 1.00000000 sec  
 d11 0.03000000 sec  
 DELTA 0.89999998 sec  
 TDO 1

CHANNEL F1  
 NUCL 13C  
 P1 9.20 usec  
 PL1 -1.00 dB  
 SFO1 75.4771000 MHz

CHANNEL F2  
 waitz16  
 NUC2 1H  
 PCPD2 80.00 usec  
 PL12 17.20 dB  
 PL13 20.20 dB  
 PL2 0.00 dB  
 SFO2 300.1315007 MHz

F2 - Processing Parameters  
 SI 131072  
 SF 75.4673663 MHz  
 MDW EM  
 SSB 0  
 TB 2.00 Hz  
 GB 0  
 FC 1.40

Spectrum 6. <sup>13</sup>C NMR spectra of OBDA 1c.

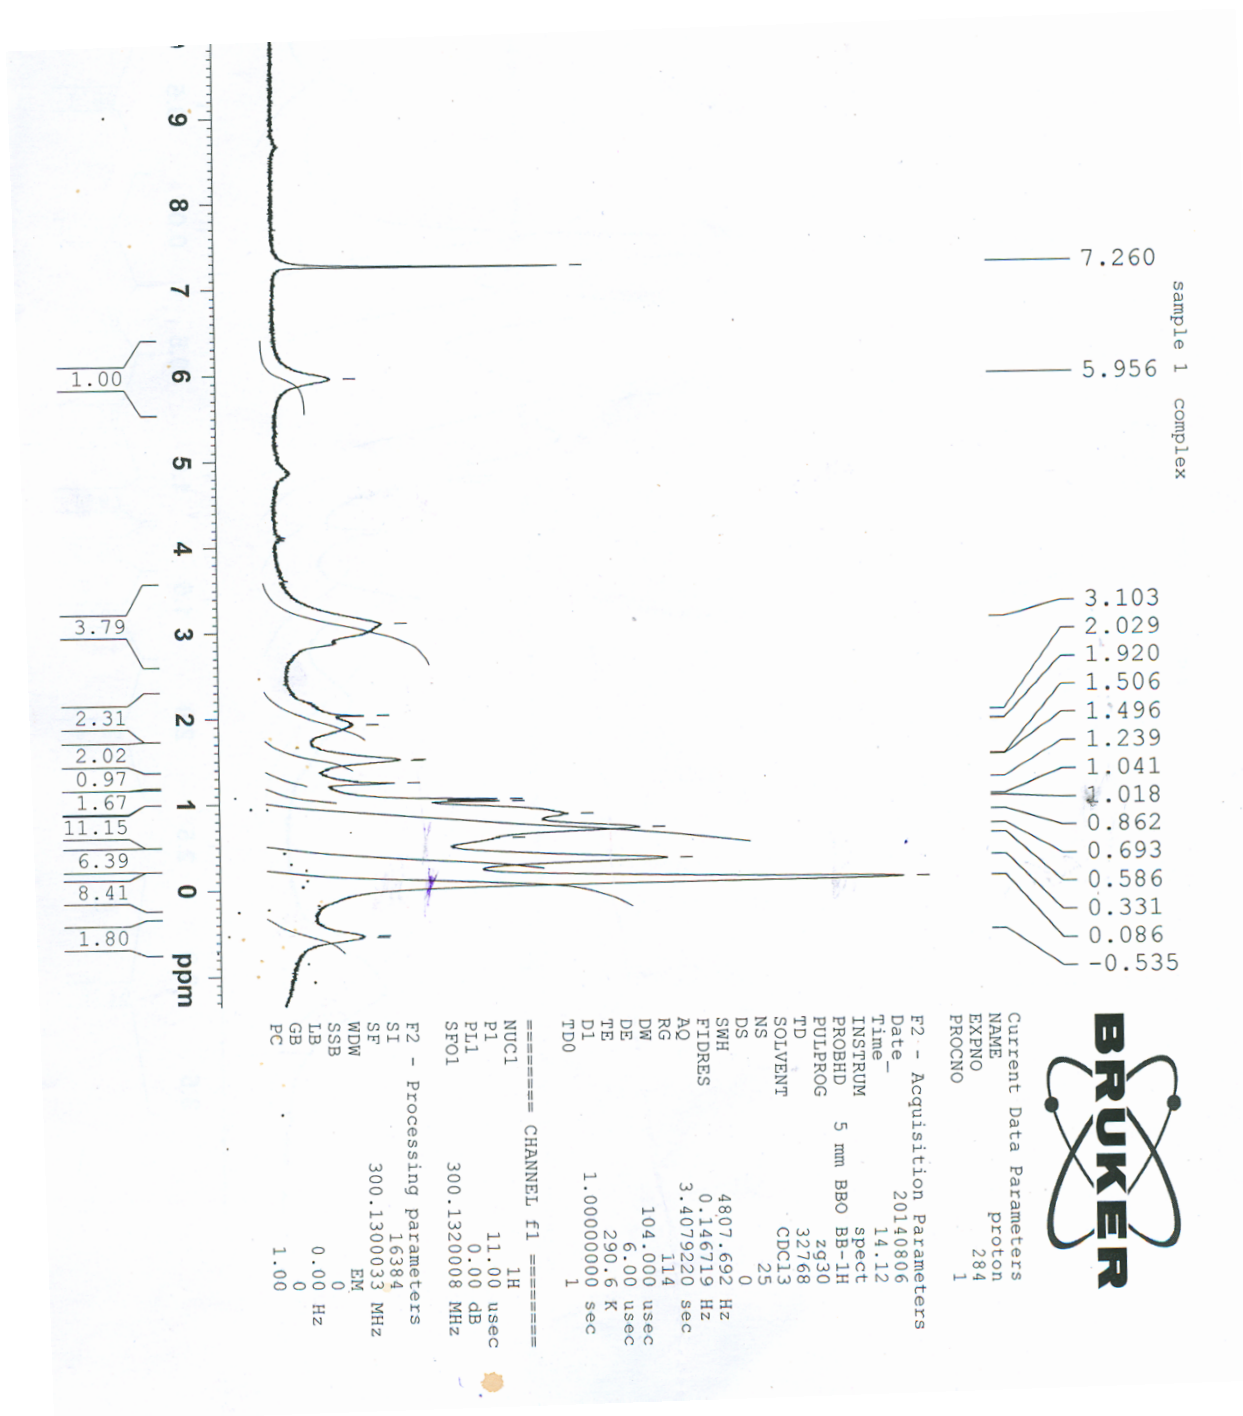

**Spectrum 7.**  $^1\text{H}$  NMR spectra of complex of  $\text{Eu}(\text{NO}_3)_3 \cdot 5\text{H}_2\text{O}$  with OBDA **1c**.

(broad peaks due to paramagnetic nature)

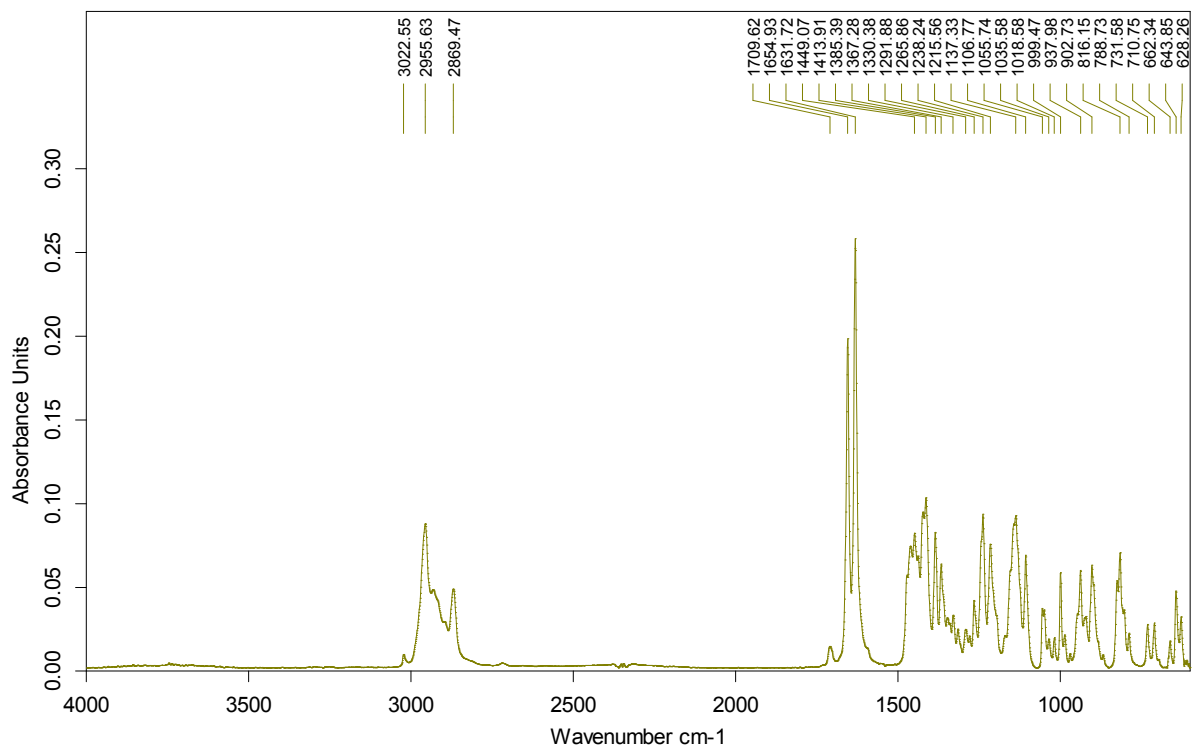

**Spectrum 8.** IR spectra of OBDA 1c.

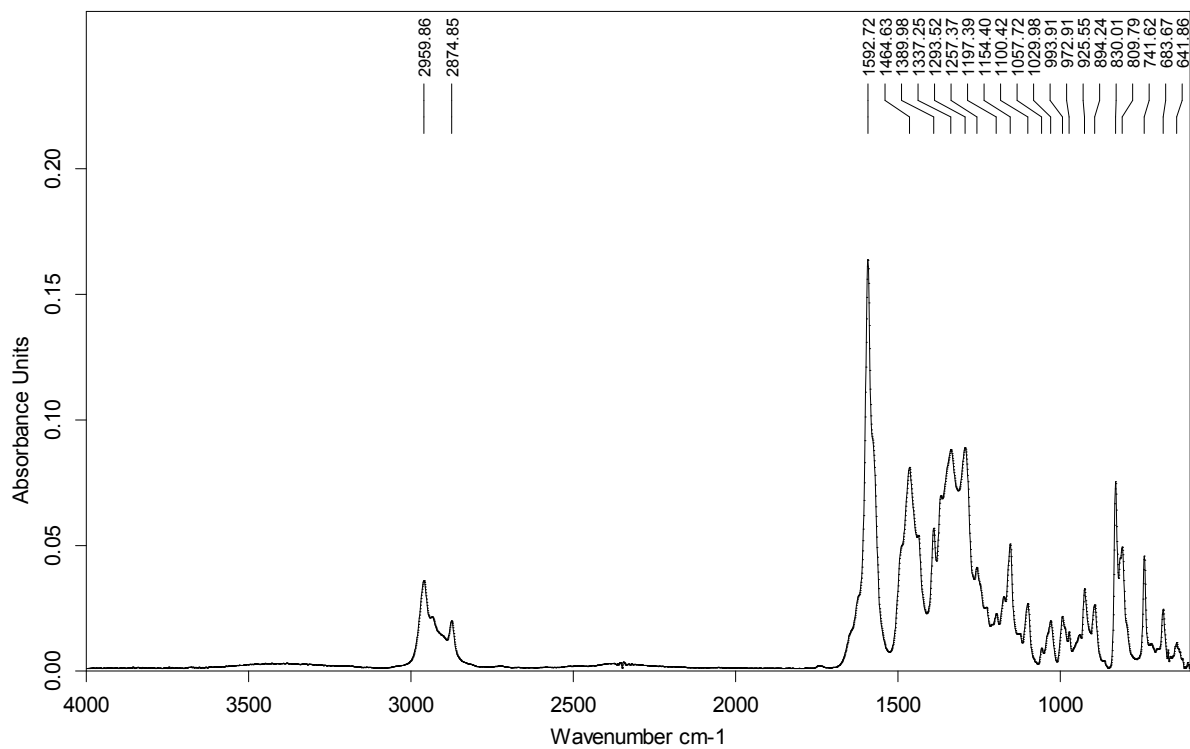

|  |  |
|--|--|
|  |  |
|--|--|

**Spectrum 9.** IR spectra of complex of  $\text{Eu}(\text{NO}_3)_3 \cdot 5\text{H}_2\text{O}$  with OBDA **1c**.

# Spectrum Plot - 11/19/2014 3:27 PM

1 A. Scan 11 from ...ernal 2014-2015\lcms-69\complex-2-1096-msms.xms

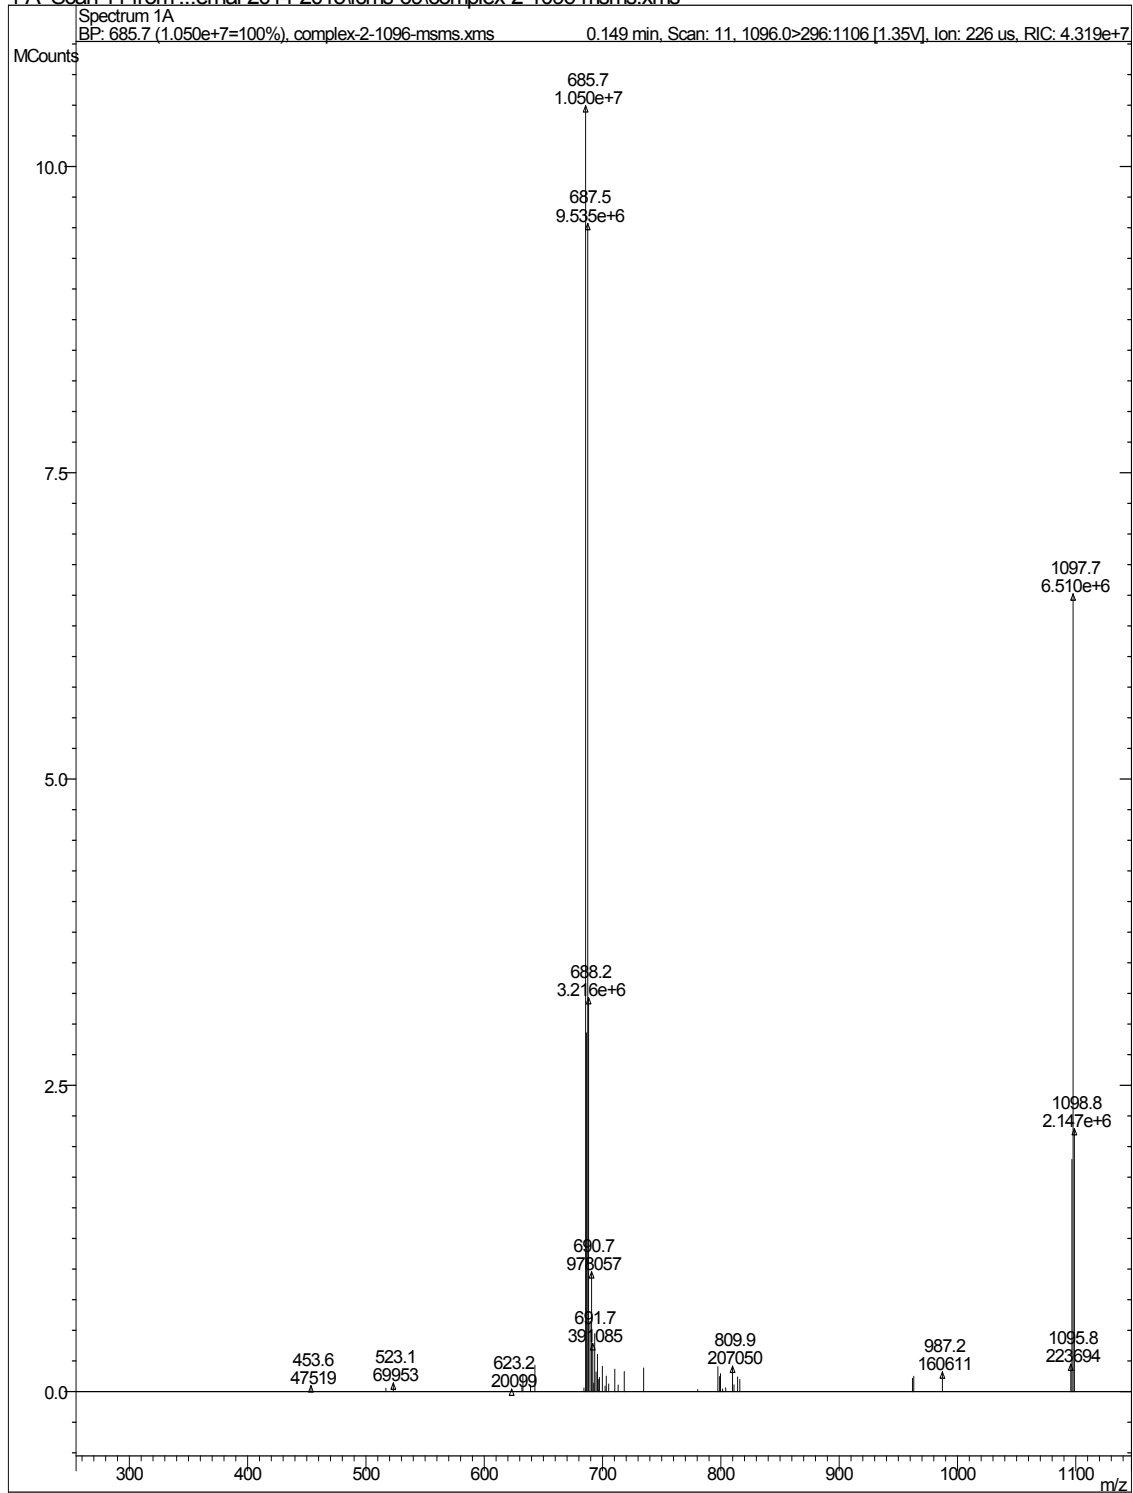

ms of ms of peak 1096.7 in ESIMS (see fig. 1 ESI-MS spectra).

# Spectrum Plot - 11/19/2014 3:28 PM

1 A. Scan 15 from ...ternal 2014-2015\lcms-69\complex-2-841-msms.xmls

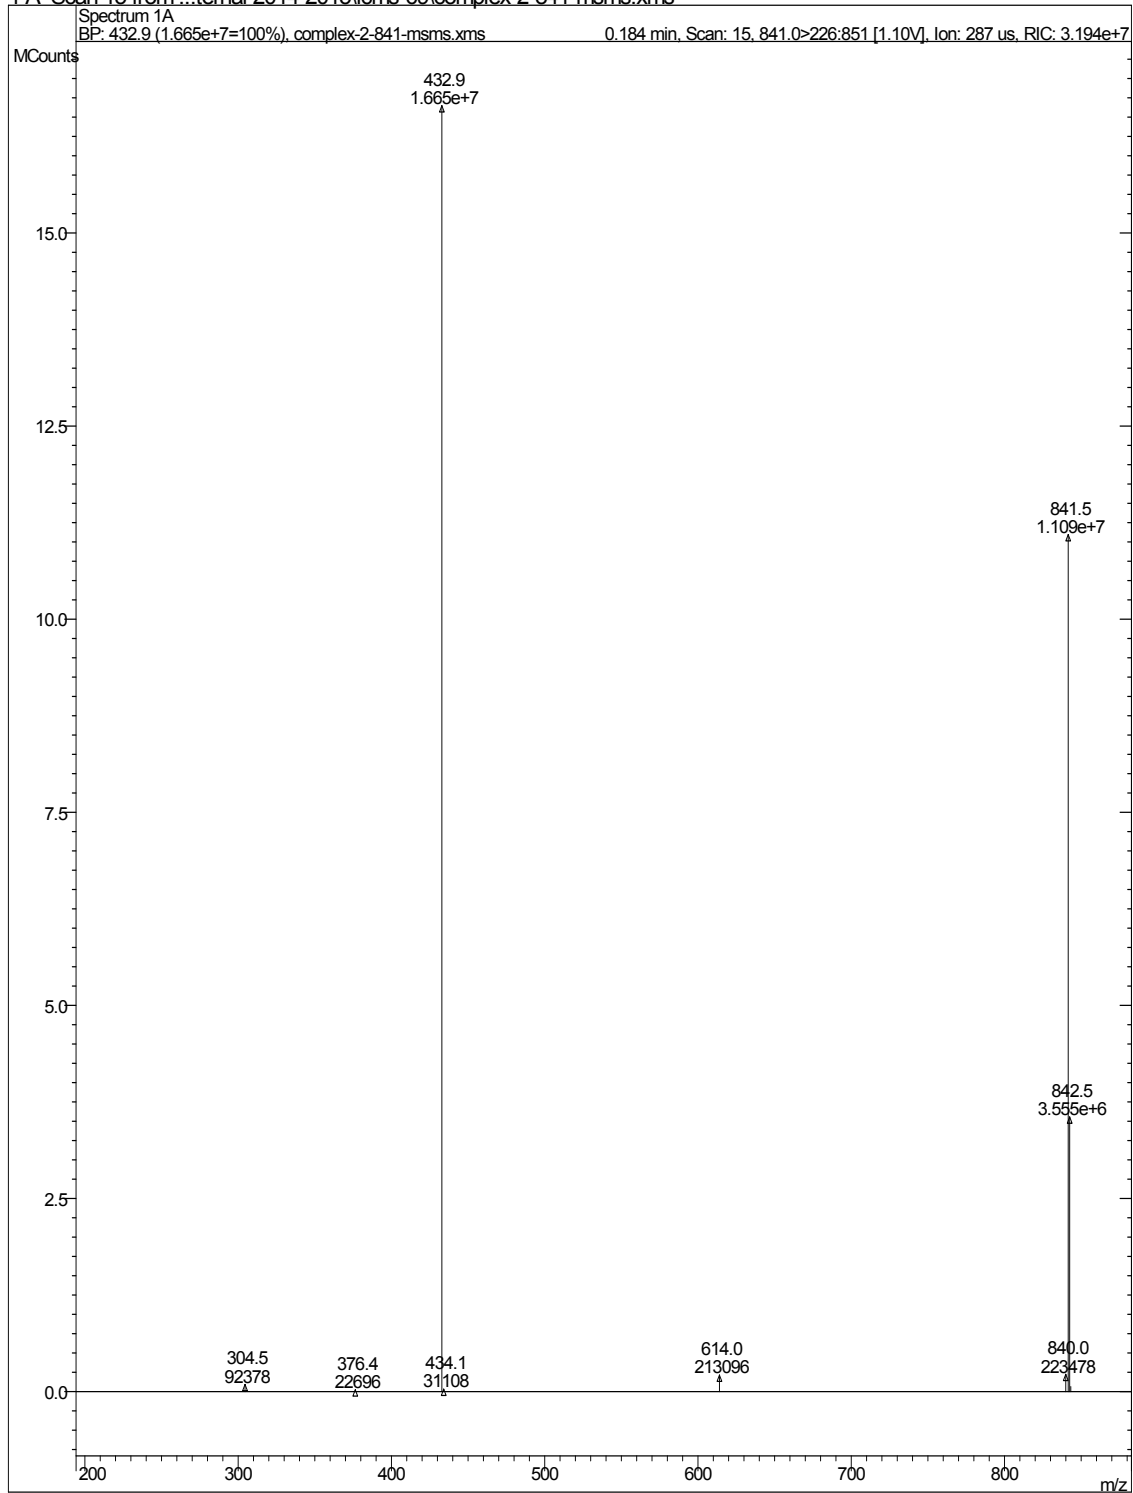

ms of ms of peak 841.7 in ESIMS (see fig. 1 ESI-MS spectra).
